# Supplementary material for: Budo in Physical Recreation as a Form of Rapprochement to Nature
Source: MDPI journal article supplement (doi:10.3390/su13126951), 2021-06-21
Supplement: s1 [file s1]

Table S1: Characteristics of the group according to the level of advancement in various martial arts.

| Degree<br>( $p=0.001^*$ ;<br>es=0.13) | Total <sup>+</sup> | karate   | kung-fu  | kick-boxing | MMA      | Idokan   | Taekwon-do | judo     | jiu-jitsu  |
|---------------------------------------|--------------------|----------|----------|-------------|----------|----------|------------|----------|------------|
| kyu/kup <sup>♦</sup>                  |                    |          |          |             |          |          |            |          |            |
| 10                                    | 4 (2,76)           | 0 (0)    | 0 (0)    | 3 (2,07)    | 0 (0)    | 1 (0,69) | 0 (0)      | 0 (0)    | 0 (0)      |
| 9                                     | 6 (4,14)           | 3 (2,07) | 0 (0)    | 0 (0)       | 0 (0)    | 0 (0)    | 3 (2,07)   | 0 (0)    | 0 (0)      |
| 8                                     | 3 (2,07)           | 2 (1,38) | 0 (0)    | 1 (0,69)    | 0 (0)    | 0 (0)    | 0 (0)      | 0 (0)    | 0 (0)      |
| 7                                     | 7 (4,83)           | 2 (1,38) | 0 (0)    | 4 (2,76)    | 0 (0)    | 1 (0,69) | 0 (0)      | 0 (0)    | 0 (0)      |
| 6                                     | 20 (13,79)         | 2 (1,38) | 1 (0,69) | 1 (0,69)    | 2 (1,38) | 0 (0)    | 0 (0)      | 2 (1,38) | 12 (8,28)  |
| 5                                     | 15 (10,34)         | 2 (1,38) | 6 (4,14) | 0 (0)       | 1 (0,69) | 2 (1,38) | 2 (1,38)   | 2 (1,38) | 0 (0)      |
| 4                                     | 37 (25,52)         | 3 (2,07) | 4 (2,76) | 0 (0)       | 1 (0,69) | 2 (1,38) | 2 (1,38)   | 4 (2,76) | 21 (14,48) |
| 3                                     | 14 (9,66)          | 2 (1,38) | 1 (0,69) | 0 (0)       | 2 (1,38) | 1 (0,69) | 1 (0,69)   | 1 (0,69) | 6 (4,14)   |
| 2                                     | 8 (5,52)           | 1 (0,69) | 1 (0,69) | 0 (0)       | 0 (0)    | 0 (0)    | 1 (0,69)   | 3 (2,07) | 2 (1,38)   |
| 1                                     | 10 (6,9)           | 0 (0)    | 6 (4,14) | 2 (1,38)    | 1 (0,69) | 0 (0)    | 1 (0,69)   | 0 (0)    | 0 (0)      |
| dan <sup>♦</sup>                      |                    |          |          |             |          |          |            |          |            |
| 1                                     | 12 (8,28)          | 0 (0)    | 4 (2,76) | 1 (0,69)    | 0 (0)    | 4 (2,76) | 1 (0,69)   | 2 (1,38) | 0 (0)      |
| 2                                     | 1 (0,69)           | 0 (0)    | 0 (0)    | 0 (0)       | 0 (0)    | 0 (0)    | 1 (0,69)   | 0 (0)    | 0 (0)      |
| 3                                     | 2 (1,38)           | 1 (0,69) | 0 (0)    | 0 (0)       | 0 (0)    | 0 (0)    | 0 (0)      | 1 (0,69) | 0 (0)      |
| 4                                     | 2 (1,38)           | 0 (0)    | 0 (0)    | 0 (0)       | 0 (0)    | 0 (0)    | 2 (1,38)   | 0 (0)    | 0 (0)      |
| 5                                     | 1 (0,69)           | 0 (0)    | 0 (0)    | 0 (0)       | 0 (0)    | 0 (0)    | 1 (0,69)   | 0 (0)    | 0 (0)      |
| 6                                     | 1 (0,69)           | 0 (0)    | 0 (0)    | 0 (0)       | 0 (0)    | 1 (0,69) | 0 (0)      | 0 (0)    | 0 (0)      |
| lack <sup>♦</sup>                     | 2 (1,38)           | 0 (0)    | 0 (0)    | 0 (0)       | 2 (1,38) | 0 (0)    | 0 (0)      | 0 (0)    | 0 (0)      |

Data are expressed as: <sup>♦</sup> (% in a given group),  
<sup>+</sup> n (% of all responses); es — effect size, \* statistical significance

Table S2: Distribution of factors motivating undertaking physical activity within martial arts, taking into account the level of education of the respondents.

| Answer<br>$p=0.004^*$<br>es = 0.04 | basic <sup>♦</sup> | medium <sup>♦</sup> | higher <sup>♦</sup> | higher/master<br>degree <sup>♦</sup> |
|------------------------------------|--------------------|---------------------|---------------------|--------------------------------------|
| 1.                                 | 23 (7,49)          | 18 (6,77)           | 12 (6,82)           | 23 (9,79)                            |
| 2.                                 | 19 (6,19)          | 10 (3,76)           | 9 (5,11)            | 10 (4,26)                            |
| 3.                                 | 15 (4,89)          | 14 (5,26)           | 9 (5,11)            | 11 (4,68)                            |
| 4.                                 | 16 (5,21)          | 9 (3,38)            | 9 (5,11)            | 6 (2,55)                             |
| 5.                                 | 22 (7,17)          | 20 (7,52)           | 12 (6,82)           | 8 (3,4)                              |
| 6.                                 | 32 (10,42)         | 32 (12,03)          | 20 (11,36)          | 30 (12,77)                           |
| 7.                                 | 35 (11,4)          | 32 (12,03)          | 19 (10,8)           | 35 (14,89)                           |
| 8.                                 | 17 (5,54)          | 15 (5,64)           | 3 (1,7)             | 1 (0,43)                             |
| 9.                                 | 11 (3,58)          | 13 (4,89)           | 9 (5,11)            | 17 (7,23)                            |
| 10.                                | 11 (3,58)          | 5 (1,88)            | 9 (5,11)            | 6 (2,55)                             |
| 11.                                | 8 (2,61)           | 2 (0,75)            | 1 (0,57)            | 2 (0,85)                             |
| 12.                                | 7 (2,28)           | 6 (2,26)            | 0 (0)               | 2 (0,85)                             |
| 13.                                | 19 (6,19)          | 19 (7,14)           | 14 (7,95)           | 27 (11,49)                           |
| 14.                                | 1 (0,33)           | 7 (2,63)            | 9 (5,11)            | 3 (1,28)                             |
| 15.                                | 28 (9,12)          | 29 (10,9)           | 20 (11,36)          | 34 (14,47)                           |
| 16.                                | 6 (1,95)           | 12 (4,51)           | 6 (3,41)            | 2 (0,85)                             |
| 17.                                | 4 (1,3)            | 1 (0,38)            | 0 (0)               | 1 (0,43)                             |
| 18.                                | 33 (10,75)         | 22 (8,27)           | 15 (8,52)           | 17 (7,23)                            |
| Total <sup>+</sup>                 | 307 (31,2)         | 266 (27,03)         | 176 (17,89)         | 235 (23,88)                          |

Data are expressed as: <sup>♦</sup> – (% in a given group),  
<sup>+</sup> – n (% of all responses); es – effect size, \* statistical significance

Table S3: Distribution of factors motivating undertaking physical activity within martial arts, taking into account individual competition groups.

| Answer<br>p=0.045*<br>es = 0.04 | jiu-jitsu♦  | taekwon -<br>do♦ | kung-fu♦    | judo♦       | MMA♦      | kick-<br>boxing♦ | idokan♦    | karate♦     |
|---------------------------------|-------------|------------------|-------------|-------------|-----------|------------------|------------|-------------|
| 1.                              | 9 (3,26)    | 5 (4,5)          | 18 (10,06)  | 14 (13,08)  | 5 (7,81)  | 6 (7,32)         | 9 (15,25)  | 10 (9,43)   |
| 2.                              | 19 (6,88)   | 6 (5,41)         | 8 (4,47)    | 4 (3,74)    | 1 (1,56)  | 3 (3,66)         | 2 (3,39)   | 5 (4,72)    |
| 3.                              | 18 (6,52)   | 6 (5,41)         | 10 (5,59)   | 7 (6,54)    | 2 (3,13)  | 2 (2,44)         | 1 (1,69)   | 3 (2,83)    |
| 4.                              | 18 (6,52)   | 5 (4,5)          | 3 (1,68)    | 3 (2,8)     | 2 (3,13)  | 3 (3,66)         | 1 (1,69)   | 5 (4,72)    |
| 5.                              | 21 (7,61)   | 8 (7,21)         | 7 (3,91)    | 10 (9,35)   | 6 (9,38)  | 6 (7,32)         | 2 (3,39)   | 2 (1,89)    |
| 6.                              | 30 (10,87)  | 15 (13,51)       | 19 (10,61)  | 10 (9,35)   | 8 (12,5)  | 11 (13,41)       | 8 (13,56)  | 13 (12,26)  |
| 7.                              | 31 (11,23)  | 15 (13,51)       | 20 (11,17)  | 13 (12,15)  | 6 (9,38)  | 11 (13,41)       | 10 (16,95) | 15 (14,15)  |
| 8.                              | 10 (3,62)   | 4 (3,6)          | 1 (0,56)    | 8 (7,48)    | 7 (10,94) | 6 (7,32)         | 0 (0)      | 0 (0)       |
| 9.                              | 9 (3,26)    | 4 (3,6)          | 14 (7,82)   | 5 (4,67)    | 4 (6,25)  | 2 (2,44)         | 1 (1,69)   | 11 (10,38)  |
| 10.                             | 7 (2,54)    | 1 (0,9)          | 10 (5,59)   | 2 (1,87)    | 3 (4,69)  | 4 (4,88)         | 4 (6,78)   | 0 (0)       |
| 11.                             | 4 (1,45)    | 2 (1,8)          | 4 (2,23)    | 1 (0,93)    | 1 (1,56)  | 0 (0)            | 0 (0)      | 1 (0,94)    |
| 12.                             | 7 (2,54)    | 1 (0,9)          | 5 (2,79)    | 0 (0)       | 1 (1,56)  | 1 (1,22)         | 0 (0)      | 0 (0)       |
| 13.                             | 22 (7,97)   | 11 (9,91)        | 15 (8,38)   | 5 (4,67)    | 5 (7,81)  | 4 (4,88)         | 5 (8,47)   | 12 (11,32)  |
| 14.                             | 9 (3,26)    | 2 (1,8)          | 6 (3,35)    | 0 (0)       | 1 (1,56)  | 1 (1,22)         | 0 (0)      | 1 (0,94)    |
| 15.                             | 29 (10,51)  | 13 (11,71)       | 20 (11,17)  | 12 (11,21)  | 5 (7,81)  | 9 (10,98)        | 7 (11,86)  | 16 (15,09)  |
| 16.                             | 8 (2,9)     | 5 (4,5)          | 3 (1,68)    | 3 (2,8)     | 1 (1,56)  | 4 (4,88)         | 2 (3,39)   | 0 (0)       |
| 17.                             | 4 (1,45)    | 0 (0)            | 0 (0)       | 1 (0,93)    | 0 (0)     | 0 (0)            | 0 (0)      | 1 (0,94)    |
| 18.                             | 21 (7,61)   | 8 (7,21)         | 16 (8,94)   | 9 (8,41)    | 6 (9,38)  | 9 (10,98)        | 7 (11,86)  | 11 (10,38)  |
| Total                           | 276 (28,05) | 111 (11,28)      | 179 (18,19) | 107 (10,87) | 64 (6,5)  | 82 (8,33)        | 59 (6)     | 106 (10,77) |

Data are expressed as: ♦ – (% in a given group),  
 + – n (% of all responses); es – effect size, \* statistical significance

Table S4: Distribution of factors motivating undertaking physical activity within martial arts, taking into account the sex

| Answer<br>p=0.268<br>es = 0.03 | men♦        | women♦      | Total+      |
|--------------------------------|-------------|-------------|-------------|
| 1.                             | 63 (8.33)   | 13 (5.70)   | 76 (7.72)   |
| 2.                             | 32 (4.23)   | 16 (7.02)   | 48 (4.88)   |
| 3.                             | 37 (4.89)   | 12 (5.26)   | 49 (4.98)   |
| 4.                             | 31 (4.10)   | 9 (3.95)    | 40 (4.07)   |
| 5.                             | 53 (7.01)   | 9 (3.95)    | 62 (6.30)   |
| 6.                             | 89 (11.77)  | 25 (10.96)  | 114 (11.59) |
| 7.                             | 92 (12.17)  | 29 (12.72)  | 121 (12.30) |
| 8.                             | 26 (3.44)   | 10 (4.39)   | 36 (3.66)   |
| 9.                             | 36 (4.76)   | 14 (6.14)   | 50 (5.08)   |
| 10.                            | 25 (3.31)   | 6 (2.63)    | 31 (3.15)   |
| 11.                            | 9 (1.19)    | 4 (1.75)    | 13 (1.32)   |
| 12.                            | 11 (1.46)   | 4 (1.75)    | 15 (1.52)   |
| 13.                            | 61 (8.07)   | 18 (7.89)   | 79 (8.03)   |
| 14.                            | 12 (1.59)   | 8 (3.51)    | 20 (2.03)   |
| 15.                            | 85 (11.24)  | 26 (11.40)  | 111 (11.28) |
| 16.                            | 22 (2.91)   | 4 (1.75)    | 26 (2.64)   |
| 17.                            | 2 (0.26)    | 4 (1.75)    | 6 (0.61)    |
| 18.                            | 70 (9.26)   | 17 (7.46)   | 87 (8.84)   |
| Total+                         | 756 (76.83) | 228 (23.17) | 984 (100)   |

Data are expressed as: ♦ – (% in a given group),  
 + – n (% of all responses); es – effect size, \* statistical significance

Table S5: Distribution of factors motivating undertaking physical activity within martial arts, taking into account the training experience

| Answer<br>p=0.403<br>es = 0.03 | less than a<br>year <sup>♦</sup> | two years <sup>♦</sup> | three years <sup>♦</sup> | four years<br>and more <sup>♦</sup> | Total <sup>+</sup> |
|--------------------------------|----------------------------------|------------------------|--------------------------|-------------------------------------|--------------------|
| 1.                             | 7 (5.93)                         | 9 (5.70)               | 10 (7.75)                | 50 (8.64)                           | 76 (7.72)          |
| 2.                             | 8 (6.78)                         | 11 (6.96)              | 5 (3.88)                 | 24 (4.15)                           | 48 (4.88)          |
| 3.                             | 5 (4.24)                         | 8 (5.06)               | 4 (3.10)                 | 32 (5.53)                           | 49 (4.98)          |
| 4.                             | 7 (5.93)                         | 10 (6.33)              | 6 (4.65)                 | 17 (2.94)                           | 40 (4.07)          |
| 5.                             | 5 (4.24)                         | 10 (6.33)              | 7 (5.43)                 | 40 (6.91)                           | 62 (6.30)          |
| 6.                             | 16 (13.56)                       | 16 (10.13)             | 13 (10.08)               | 69 (11.92)                          | 114 (11.59)        |
| 7.                             | 16 (13.56)                       | 20 (12.66)             | 13 (10.08)               | 72 (12.44)                          | 121 (12.30)        |
| 8.                             | 2 (1.69)                         | 7 (4.43)               | 4 (3.10)                 | 23 (3.97)                           | 36 (3.66)          |
| 9.                             | 7 (5.93)                         | 6 (3.80)               | 7 (5.43)                 | 30 (5.18)                           | 50 (5.08)          |
| 10.                            | 2 (1.69)                         | 3 (1.90)               | 8 (6.20)                 | 18 (3.11)                           | 31 (3.15)          |
| 11.                            | 1 (0.85)                         | 4 (2.53)               | 3 (2.33)                 | 5 (0.86)                            | 13 (1.32)          |
| 12.                            | ----                             | 5 (3.16)               | 4 (3.10)                 | 6 (1.04)                            | 15 (1.52)          |
| 13.                            | 8 (6.78)                         | 12 (7.59)              | 11 (8.53)                | 48 (8.29)                           | 79 (8.03)          |
| 14.                            | 4 (3.39)                         | 4 (2.53)               | 4 (3.10)                 | 8 (1.38)                            | 20 (2.03)          |
| 15.                            | 16 (13.56)                       | 16 (10.13)             | 14 (10.85)               | 65 (11.23)                          | 111 (11.28)        |
| 16.                            | ----                             | 4 (2.53)               | 2 (1.55)                 | 20 (3.45)                           | 26 (2.64)          |
| 17.                            | 3 (2.54)                         | 1 (0.63)               | ----                     | 2 (0.35)                            | 6 (0.61)           |
| 18.                            | 11 (9.32)                        | 12 (7.59)              | 14 (10.85)               | 50 (8.64)                           | 87 (8.84)          |
| Total <sup>+</sup>             | 118 (11.99)                      | 158 (16.06)            | 129 (13.11)              | 579 (58.84)                         | 984 (100)          |

Data are expressed as: <sup>♦</sup> – (% in a given group),  
<sup>+</sup> – n (% of all responses); es – effect size, \* statistical significance

Table S6: Distribution of factors motivating undertaking physical activity within martial arts, taking into account the parents' support in martial arts training

| Answer<br>p=0.983<br>es = 0.03 | definitely<br>yes <sup>♦</sup> | rather yes <sup>♦</sup> | hard to say <sup>♦</sup> | probably<br>not <sup>♦</sup> | definitely<br>not <sup>♦</sup> | Total <sup>+</sup> |
|--------------------------------|--------------------------------|-------------------------|--------------------------|------------------------------|--------------------------------|--------------------|
| 1.                             | 37 (7.39)                      | 16 (7.73)               | 10 (7.58)                | 9 (9.28)                     | 4 (8.51)                       | 76 (7.72)          |
| 2.                             | 28 (5.59)                      | 8 (3.86)                | 5 (3.79)                 | 5 (5.15)                     | 2 (4.26)                       | 48 (4.88)          |
| 3.                             | 32 (6.39)                      | 10 (4.83)               | 5 (3.79)                 | 1 (1.03)                     | 1 (2.13)                       | 49 (4.98)          |
| 4.                             | 22 (4.39)                      | 6 (2.90)                | 5 (3.79)                 | 4 (4.12)                     | 3 (6.38)                       | 40 (4.07)          |
| 5.                             | 32 (6.39)                      | 13 (6.28)               | 11 (8.33)                | 3 (3.09)                     | 3 (6.38)                       | 62 (6.30)          |
| 6.                             | 55 (10.98)                     | 26 (12.56)              | 17 (12.88)               | 10 (10.31)                   | 6 (12.77)                      | 114 (11.59)        |
| 7.                             | 61 (12.18)                     | 24 (11.59)              | 16 (12.12)               | 13 (13.40)                   | 7 (14.89)                      | 121 (12.30)        |
| 8.                             | 22 (4.39)                      | 9 (4.35)                | 3 (2.27)                 | 1 (1.03)                     | 1 (2.13)                       | 36 (3.66)          |
| 9.                             | 25 (4.99)                      | 10 (4.83)               | 6 (4.55)                 | 5 (5.15)                     | 4 (8.51)                       | 50 (5.08)          |
| 10.                            | 15 (2.99)                      | 5 (2.42)                | 3 (2.27)                 | 7 (7.22)                     | 1 (2.13)                       | 31 (3.15)          |
| 11.                            | 9 (1.80)                       | 2 (0.97)                | ----                     | 1 (1.03)                     | 1 (2.13)                       | 13 (1.32)          |
| 12.                            | 9 (1.80)                       | 2 (0.97)                | 3 (2.27)                 | 1 (1.03)                     | ----                           | 15 (1.52)          |
| 13.                            | 35 (6.99)                      | 19 (9.18)               | 13 (9.85)                | 10 (10.31)                   | 2 (4.26)                       | 79 (8.03)          |
| 14.                            | 7 (1.40)                       | 5 (2.42)                | 4 (3.03)                 | 2 (2.06)                     | 2 (4.26)                       | 20 (2.03)          |
| 15.                            | 50 (9.98)                      | 24 (11.59)              | 17 (12.88)               | 14 (14.43)                   | 6 (12.77)                      | 111 (11.28)        |
| 16.                            | 10 (2.00)                      | 9 (4.35)                | 5 (3.79)                 | 2 (2.06)                     | ----                           | 26 (2.64)          |
| 17.                            | 4 (0.80)                       | 2 (0.97)                | ----                     | ----                         | ----                           | 6 (0.61)           |
| 18.                            | 48 (9.58)                      | 17 (8.21)               | 9 (6.82)                 | 9 (9.28)                     | 4 (8.51)                       | 87 (8.84)          |
| Total <sup>+</sup>             | 501 (50.91)                    | 207 (21.04)             | 132 (13.41)              | 97 (9.86)                    | 47 (4.78)                      | 984 (100)          |

Data are expressed as: <sup>♦</sup> – (% in a given group),  
<sup>+</sup> – n (% of all responses); es – effect size, \* statistical significance

Table S7: Distribution of factors motivating undertaking physical activity within martial arts, taking into account the training frequency

| Answer<br>p=0.348<br>es = 0.03 | once <sup>♦</sup> | twice <sup>♦</sup> | three times <sup>♦</sup> | four times<br>and more <sup>♦</sup> | Total <sup>+</sup> |
|--------------------------------|-------------------|--------------------|--------------------------|-------------------------------------|--------------------|
| 1.                             | 4 (10.26)         | 25 (6.83)          | 26 (9.42)                | 21 (6.93)                           | 76 (7.72)          |
| 2.                             | 1 (2.56)          | 24 (6.56)          | 11 (3.99)                | 12 (3.96)                           | 48 (4.88)          |
| 3.                             | ----              | 19 (5.19)          | 9 (3.26)                 | 21 (6.93)                           | 49 (4.98)          |
| 4.                             | ----              | 21 (5.74)          | 8 (2.90)                 | 11 (3.63)                           | 40 (4.07)          |
| 5.                             | 1 (2.56)          | 15 (4.10)          | 21 (7.61)                | 25 (8.25)                           | 62 (6.30)          |
| 6.                             | 6 (15.38)         | 42 (11.48)         | 33 (11.96)               | 33 (10.89)                          | 114 (11.59)        |
| 7.                             | 7 (17.95)         | 45 (12.30)         | 33 (11.96)               | 36 (11.88)                          | 121 (12.30)        |
| 8.                             | ----              | 7 (1.91)           | 15 (5.43)                | 14 (4.62)                           | 36 (3.66)          |
| 9.                             | 4 (10.26)         | 18 (4.92)          | 11 (3.99)                | 17 (5.61)                           | 50 (5.08)          |
| 10.                            | 1 (2.56)          | 8 (2.19)           | 10 (3.62)                | 12 (3.96)                           | 31 (3.15)          |
| 11.                            | ----              | 6 (1.64)           | 5 (1.81)                 | 2 (0.66)                            | 13 (1.32)          |
| 12.                            | ----              | 6 (1.64)           | 6 (2.17)                 | 3 (0.99)                            | 15 (1.52)          |
| 13.                            | 5 (12.82)         | 33 (9.02)          | 22 (7.97)                | 19 (6.27)                           | 79 (8.03)          |
| 14.                            | ----              | 8 (2.19)           | 5 (1.81)                 | 7 (2.31)                            | 20 (2.03)          |
| 15.                            | 6 (15.38)         | 43 (11.75)         | 28 (10.14)               | 34 (11.22)                          | 111 (11.28)        |
| 16.                            | ----              | 6 (1.64)           | 9 (3.26)                 | 11 (3.63)                           | 26 (2.64)          |
| 17.                            | ----              | 4 (1.09)           | ----                     | 2 (0.66)                            | 6 (0.61)           |
| 18.                            | 4 (10.26)         | 36 (9.84)          | 24 (8.70)                | 23 (7.59)                           | 87 (8.84)          |
| Total <sup>+</sup>             | 39 (3.96)         | 366 (37.20)        | 276 (28.05)              | 303 (30.79)                         | 984 (100)          |

Data are expressed as: <sup>♦</sup> – (% in a given group),  
<sup>+</sup> – n (% of all responses); es – effect size, \* statistical significance

Table S8: Distribution of factors motivating undertaking physical activity within martial arts, taking into account the place of residence

| Answer<br>p=0.059<br>es = 0.04 | with<br>parents <sup>♦</sup> | dormitory/<br>boarding<br>house <sup>♦</sup> | own flat/<br>house <sup>♦</sup> | school<br>boarding<br>house <sup>♦</sup> | Total <sup>+</sup> |
|--------------------------------|------------------------------|----------------------------------------------|---------------------------------|------------------------------------------|--------------------|
| 1.                             | 36 (7.19)                    | 3 (6.00)                                     | 35 (8.45)                       | 2 (10.53)                                | 76 (7.72)          |
| 2.                             | 28 (5.59)                    | 3 (6.00)                                     | 17 (4.11)                       | ----                                     | 48 (4.88)          |
| 3.                             | 25 (4.99)                    | 1 (2.00)                                     | 22 (5.31)                       | 1 (5.26)                                 | 49 (4.98)          |
| 4.                             | 24 (4.79)                    | 1 (2.00)                                     | 15 (3.62)                       | ----                                     | 40 (4.07)          |
| 5.                             | 38 (7.58)                    | 2 (4.00)                                     | 20 (4.83)                       | 2 (10.53)                                | 62 (6.30)          |
| 6.                             | 55 (10.98)                   | 6 (12.00)                                    | 52 (12.56)                      | 1 (5.26)                                 | 114 (11.59)        |
| 7.                             | 57 (11.38)                   | 6 (12.00)                                    | 57 (13.77)                      | 1 (5.26)                                 | 121 (12.30)        |
| 8.                             | 30 (5.99)                    | 2 (4.00)                                     | 2 (0.48)                        | 2 (10.53)                                | 36 (3.66)          |
| 9.                             | 19 (3.79)                    | 3 (6.00)                                     | 27 (6.52)                       | 1 (5.26)                                 | 50 (5.08)          |
| 10.                            | 14 (2.79)                    | 1 (2.00)                                     | 14 (3.38)                       | 2 (10.53)                                | 31 (3.15)          |
| 11.                            | 9 (1.80)                     | ----                                         | 4 (0.97)                        | ----                                     | 13 (1.32)          |
| 12.                            | 10 (2.00)                    | 1 (2.00)                                     | 3 (0.72)                        | 1 (5.26)                                 | 15 (1.52)          |
| 13.                            | 33 (6.59)                    | 6 (12.00)                                    | 40 (9.66)                       | ----                                     | 79 (8.03)          |
| 14.                            | 7 (1.40)                     | 2 (4.00)                                     | 11 (2.66)                       | ----                                     | 20 (2.03)          |
| 15.                            | 49 (9.78)                    | 7 (14.00)                                    | 53 (12.8)                       | 2 (10.53)                                | 111 (11.28)        |
| 16.                            | 15 (2.99)                    | 2 (4.00)                                     | 7 (1.69)                        | 2 (10.53)                                | 26 (2.64)          |
| 17.                            | 5 (1.00)                     | ----                                         | 1 (0.24)                        | ----                                     | 6 (0.61)           |
| 18.                            | 47 (9.38)                    | 4 (8.00)                                     | 34 (8.21)                       | 2 (10.53)                                | 87 (8.84)          |
| Total <sup>+</sup>             | 501 (50.91)                  | 50 (5.08)                                    | 414 (42.07)                     | 19 (1.93)                                | 984 (100)          |

Data are expressed as: <sup>♦</sup> – (% in a given group),  
<sup>+</sup> – n (% of all responses); es – effect size, \* statistical significance

Table S9: Respondents' attitude to practicing/training martial arts in their spare time by sex.

| Sex<br>p=0.408<br>es = 0.13 | 1          | 2          | 3        | 4          | 5          | Total <sup>+</sup> |
|-----------------------------|------------|------------|----------|------------|------------|--------------------|
| woman <sup>♦</sup>          | 14 (38.89) | 10 (27.78) | 2 (5.56) | 6 (16.67)  | 4 (11.11)  | 36 (24.83)         |
| man <sup>♦</sup>            | 56 (51.38) | 20 (18.35) | 5 (4.59) | 10 (9.17)  | 18 (16.51) | 109 (75.17)        |
| Total <sup>+</sup>          | 70 (48.28) | 30 (20.69) | 7 (4.83) | 16 (11.03) | 22 (15.17) | 145 (100)          |

Data are expressed as: <sup>♦</sup> – (% in a given group), <sup>+</sup> – n (% of all responses); es – effect size,  
<sup>\*</sup> statistical significance; 1 - most willingly, 2 - willingly, 3 - indifferent,  
 4 - not very willingly, 5 - reluctantly

Table S10: Respondents' attitude to practicing/training martial arts in relation to the level of education

| Education<br>p = 0.195<br>es = 0.10 | 1          | 2          | 3        | 4          | 5          | Total <sup>+</sup> |
|-------------------------------------|------------|------------|----------|------------|------------|--------------------|
| basic <sup>♦</sup>                  | 27 (55.10) | 12 (24.49) | 1 (2.04) | 6 (12.24)  | 3 (6.12)   | 49 (33.79)         |
| medium <sup>♦</sup>                 | 15 (41.67) | 8 (22.22)  | 3 (8.33) | 4 (11.11)  | 6 (16.67)  | 36 (24.83)         |
| higher <sup>♦</sup>                 | 6 (28.57)  | 4 (19.05)  | 1 (4.76) | 2 (9.52)   | 8 (38.10)  | 21 (14.48)         |
| higher/master degree <sup>♦</sup>   | 22 (56.41) | 6 (15.38)  | 2 (5.13) | 4 (10.26)  | 5 (12.82)  | 39 (26.90)         |
| Total <sup>+</sup>                  | 70 (48.28) | 30 (20.69) | 7 (4.83) | 16 (11.03) | 22 (15.17) | 145 (100)          |

Data are expressed as: <sup>♦</sup> – (% in a given group), <sup>+</sup> – n (% of all responses); es – effect size,  
<sup>\*</sup> statistical significance; 1 - most willingly, 2 - willingly, 3 - indifferent,  
 4 - not very willingly, 5 - reluctantly

Table S11: Respondents' attitude to practicing/training martial arts in relation to the training experience

| Training experience<br>p = 0.182<br>es = 0.10 | 1          | 2          | 3         | 4          | 5          | Total <sup>+</sup> |
|-----------------------------------------------|------------|------------|-----------|------------|------------|--------------------|
| less than a year <sup>♦</sup>                 | 11 (52.38) | 3 (14.29)  | 1 (4.76)  | 1 (4.76)   | 5 (23.81)  | 21 (14.48)         |
| two years <sup>♦</sup>                        | 11 (42.31) | 8 (30.77)  | 2 (7.69)  | 4 (15.38)  | 1 (3.85)   | 26 (17.93)         |
| three years <sup>♦</sup>                      | 5 (33.33)  | 6 (40.00)  | 2 (13.33) | 1 (6.67)   | 1 (6.67)   | 15 (10.34)         |
| four years and more <sup>♦</sup>              | 43 (51.81) | 13 (15.66) | 2 (2.41)  | 10 (12.05) | 15 (18.07) | 83 (57.24)         |
| Total <sup>+</sup>                            | 70 (48.28) | 30 (20.69) | 7 (4.83)  | 16 (11.03) | 22 (15.17) | 145 (100)          |

Data are expressed as: <sup>♦</sup> – (% in a given group), <sup>+</sup> – n (% of all responses); es – effect size,  
<sup>\*</sup> statistical significance; 1 - most willingly, 2 - willingly, 3 - indifferent,  
 4 - not very willingly, 5 - reluctantly

Table S12: Respondents' attitude to practicing/training martial arts in relation to the parents' support in martial arts training

| Support from parents<br>p = 0.069<br>es = 0.10 | 1          | 2          | 3         | 4          | 5          | Total <sup>+</sup> |
|------------------------------------------------|------------|------------|-----------|------------|------------|--------------------|
| definitely not <sup>♦</sup>                    | 4 (57.14)  | ----       | 1 (14.29) | 1 (14.29)  | 1 (14.29)  | 7 (4.83)           |
| probably not <sup>♦</sup>                      | 7 (43.75)  | 4 (25.00)  | ----      | 1 (6.25)   | 4 (25.00)  | 16 (11.03)         |
| hard to say <sup>♦</sup>                       | 7 (38.89)  | 5 (27.78)  | 3 (16.67) | 1 (5.56)   | 2 (11.11)  | 18 (12.41)         |
| rather yes <sup>♦</sup>                        | 9 (29.03)  | 7 (22.58)  | 1 (3.23)  | 8 (25.81)  | 6 (19.35)  | 31 (21.38)         |
| definitely yes <sup>♦</sup>                    | 43 (58.90) | 14 (19.18) | 2 (2.74)  | 5 (6.85)   | 9 (12.33)  | 73 (50.34)         |
| Total <sup>+</sup>                             | 70 (48.28) | 30 (20.69) | 7 (4.83)  | 16 (11.03) | 22 (15.17) | 145 (100)          |

Data are expressed as: <sup>♦</sup> – (% in a given group), <sup>+</sup> – n (% of all responses); es – effect size,  
<sup>\*</sup> statistical significance; 1 - most willingly, 2 - willingly, 3 - indifferent,  
 4 - not very willingly, 5 - reluctantly

Table S13: Respondents' attitude to practicing/training martial arts in relation to the type of martial art

| Type of martial art<br>p = 0.296<br>es = 0.09 | 1          | 2          | 3         | 4          | 5          | Total <sup>+</sup> |
|-----------------------------------------------|------------|------------|-----------|------------|------------|--------------------|
| karate <sup>♦</sup>                           | 4 (22.22)  | 5 (27.78)  | 2 (11.11) | 4 (22.22)  | 3 (16.67)  | 18 (12.41)         |
| kung-fu <sup>♦</sup>                          | 8 (34.78)  | 7 (30.43)  | 1 (4.35)  | 2 (8.70)   | 5 (21.74)  | 23 (15.86)         |
| kickboxing <sup>♦</sup>                       | 5 (41.67)  | 2 (16.67)  | ----      | ----       | 4 (33.33)  | 12 (8.28)          |
| MMA <sup>♦</sup>                              | 7 (77.78)  | 1 (11.11)  | ----      | ----       | 1 (11.11)  | 9 (6.21)           |
| Idokan <sup>♦</sup>                           | 8 (66.67)  | 2 (16.67)  | ----      | 1 (8.33)   | 1 (8.33)   | 12 (8.28)          |
| taekwondo <sup>♦</sup>                        | 6 (40.00)  | 2 (13.33)  | ----      | 3 (20.00)  | 4 (26.67)  | 15 (10.34)         |
| judo <sup>♦</sup>                             | 9 (60.00)  | 5 (33.33)  | ----      | ----       | 1 (6.67)   | 15 (10.34)         |
| jiu-jitsu <sup>♦</sup>                        | 23 (56.1)  | 6 (14.63)  | 3 (7.32)  | 6 (14.63)  | 3 (7.32)   | 41 (28.28)         |
| Total <sup>+</sup>                            | 70 (48.28) | 30 (20.69) | 7 (4.83)  | 16 (11.03) | 22 (15.17) | 145 (100)          |

Data are expressed as: <sup>♦</sup> – (% in a given group), <sup>+</sup> – n (% of all responses); es – effect size,  
<sup>\*</sup> statistical significance; 1 - most willingly, 2 - willingly, 3 - indifferent,  
 4 - not very willingly, 5 - reluctantly

Table S14: Respondents' attitude to practicing/training martial arts in relation to the training frequency

| Training frequency<br>p = 0.294<br>es = 0.09 | 1          | 2          | 3         | 4          | 5          | Total <sup>+</sup> |
|----------------------------------------------|------------|------------|-----------|------------|------------|--------------------|
| once <sup>♦</sup>                            | 3 (33.33)  | 2 (22.22)  | 1 (11.11) | 2 (22.22)  | 1 (11.11)  | 9 (6.21)           |
| twice <sup>♦</sup>                           | 24 (41.38) | 13 (22.41) | 5 (8.62)  | 9 (15.52)  | 7 (12.07)  | 58 (40.00)         |
| three times <sup>♦</sup>                     | 18 (46.15) | 10 (25.64) | 1 (2.56)  | 3 (7.69)   | 7 (17.95)  | 39 (26.90)         |
| four times and more <sup>♦</sup>             | 25 (64.10) | 5 (12.82)  | ----      | 2 (5.13)   | 7 (17.95)  | 39 (26.90)         |
| Total <sup>+</sup>                           | 70 (48.28) | 30 (20.69) | 7 (4.83)  | 16 (11.03) | 22 (15.17) | 145 (100)          |

Data are expressed as: <sup>♦</sup> – (% in a given group), <sup>+</sup> – n (% of all responses); es – effect size,  
<sup>\*</sup> statistical significance; 1 - most willingly, 2 - willingly, 3 - indifferent,  
 4 - not very willingly, 5 - reluctantly

Table S15: Respondents' attitude to practicing/training martial arts in relation to the place of residence

| Place of residence<br>p = 0.199<br>es = 0.10 | 1          | 2          | 3        | 4          | 5          | Total <sup>+</sup> |
|----------------------------------------------|------------|------------|----------|------------|------------|--------------------|
| own flat/ house <sup>♦</sup>                 | 33 (54.10) | 9 (14.75)  | 3 (4.92) | 4 (6.56)   | 12 (19.67) | 61 (42.07)         |
| with parents <sup>♦</sup>                    | 35 (47.30) | 17 (22.97) | 3 (4.05) | 9 (12.16)  | 10 (13.51) | 74 (51.03)         |
| dormitory/boarding house <sup>♦</sup>        | 1 (12.50)  | 3 (37.50)  | 1 (12.5) | 3 (37.50)  | ----       | 8 (5.52)           |
| school boarding house <sup>♦</sup>           | 1 (50.00)  | 1 (50.00)  | ----     | ----       | ----       | 2 (1.38)           |
| Total <sup>+</sup>                           | 70 (48.28) | 30 (20.69) | 7 (4.83) | 16 (11.03) | 22 (15.17) | 145 (100)          |

Data are expressed as: <sup>♦</sup> – (% in a given group), <sup>+</sup> – n (% of all responses); es – effect size,  
<sup>\*</sup> statistical significance; 1 - most willingly, 2 - willingly, 3 - indifferent,  
 4 - not very willingly, 5 - reluctantly

Table S16: Respondents' attitude to their own health in relation to parents' support in martial arts training.

| Support from parents<br>p=0.015 <sup>*</sup><br>es = 0.11 | 1          | 2          | 3          | 4         | 5         | Total <sup>+</sup> |
|-----------------------------------------------------------|------------|------------|------------|-----------|-----------|--------------------|
| definitely not <sup>♦</sup>                               | 2 (28.57)  | 4 (57.14)  | 0 (0)      | 0 (0)     | 1 (14.29) | 7 (4.83)           |
| probably not <sup>♦</sup>                                 | 4 (25)     | 7 (43.75)  | 5 (31.25)  | 0 (0)     | 0 (0)     | 16 (11.03)         |
| hard to say <sup>♦</sup>                                  | 9 (50)     | 7 (38.89)  | 2 (11.11)  | 0 (0)     | 0 (0)     | 18 (12.41)         |
| rather yes <sup>♦</sup>                                   | 9 (29.03)  | 7 (22.58)  | 5 (16.13)  | 7 (22.58) | 3 (9.68)  | 31 (21.38)         |
| definitely yes <sup>♦</sup>                               | 34 (46.58) | 23 (31.51) | 5 (6.85)   | 4 (5.48)  | 7 (9.59)  | 73 (50.34)         |
| Total <sup>+</sup>                                        | 58 (40)    | 48 (33.1)  | 17 (11.72) | 11 (7.59) | 11 (7.59) | 145 (100)          |

Table S17: The respondents' attitude to their own health in relation to the sex

| Sex<br>p = 0.754<br>es = 0.06 | 1          | 2          | 3          | 4         | 5         | Total <sup>+</sup> |
|-------------------------------|------------|------------|------------|-----------|-----------|--------------------|
| women <sup>♦</sup>            | 12 (33.33) | 13 (36.11) | 5 (13.89)  | 4 (11.11) | 2 (5.56)  | 36 (24.83)         |
| men <sup>♦</sup>              | 46 (42.20) | 35 (32.11) | 12 (11.01) | 7 (6.42)  | 9 (8.26)  | 109 (75.17)        |
| Total <sup>+</sup>            | 58 (40.00) | 48 (33.10) | 17 (11.72) | 11 (7.59) | 11 (7.59) | 145 (100)          |

Data are expressed as: <sup>♦</sup> – (% in a given group), <sup>+</sup> – n (% of all responses); es – effect size,  
<sup>\*</sup> statistical significance; 1 - health is the most important for me, 2 - important,  
 3 - indifferent, 4 - not very important, 5 - completely unimportant

Table S18: The respondents' attitude to their own health in relation to the training experience

| Training experience<br>p = 0.515<br>es = 0.08 | 1          | 2          | 3          | 4         | 5         | Total <sup>+</sup> |
|-----------------------------------------------|------------|------------|------------|-----------|-----------|--------------------|
| less than a year <sup>♦</sup>                 | 7 (33.33)  | 8 (38.10)  | 2 (9.52)   | 1 (4.76)  | 3 (14.29) | 21 (14.48)         |
| two years <sup>♦</sup>                        | 7 (26.92)  | 9 (34.62)  | 6 (23.08)  | 3 (11.54) | 1 (3.85)  | 26 (17.93)         |
| three years <sup>♦</sup>                      | 8 (53.33)  | 5 (33.33)  | 2 (13.33)  | ----      | ----      | 15 (10.34)         |
| four years and more <sup>♦</sup>              | 36 (43.37) | 26 (31.33) | 7 (8.43)   | 7 (8.43)  | 7 (8.43)  | 83 (57.24)         |
| Total <sup>+</sup>                            | 58 (40.00) | 48 (33.10) | 17 (11.72) | 11 (7.59) | 11 (7.59) | 145 (100)          |

Data are expressed as: <sup>♦</sup> – (% in a given group), <sup>+</sup> – n (% of all responses); es – effect size,  
<sup>\*</sup> statistical significance; 1 - health is the most important for me, 2 - important,  
 3 - indifferent, 4 - not very important, 5 - completely unimportant

Table S19: The respondents' attitude to their own health in relation to the type of martial art

| Type of martial art<br>p = 0.195<br>es = 0.09 | 1          | 2          | 3          | 4         | 5         | Total <sup>+</sup> |
|-----------------------------------------------|------------|------------|------------|-----------|-----------|--------------------|
| karate <sup>♦</sup>                           | 4 (22.22)  | 9 (50.00)  | 3 (16.67)  | 1 (5.56)  | 1 (5.56)  | 18 (12.41)         |
| kung-fu <sup>♦</sup>                          | 7 (30.43)  | 7 (30.43)  | 2 (8.70)   | 3 (13.04) | 4 (17.39) | 23 (15.86)         |
| kickboxing <sup>♦</sup>                       | 4 (33.33)  | 3 (25.00)  | 4 (33.33)  | ----      | 1 (8.33)  | 12 (8.28)          |
| MMA <sup>♦</sup>                              | 7 (77.78)  | 1 (11.11)  | ----       | 1 (11.11) | ----      | 9 (6.21)           |
| Idokan <sup>♦</sup>                           | 8 (66.67)  | 2 (16.67)  | 2 (16.67)  | ----      | ----      | 12 (8.28)          |
| taekwondo <sup>♦</sup>                        | 4 (26.67)  | 5 (33.33)  | 1 (6.67)   | 3 (20.00) | 2 (13.33) | 15 (10.34)         |
| judo <sup>♦</sup>                             | 8 (53.33)  | 5 (33.33)  | ----       | 1 (6.67)  | 1 (6.67)  | 15 (10.34)         |
| jiu-jitsu <sup>♦</sup>                        | 16 (39.02) | 16 (39.02) | 5 (12.20)  | 2 (4.88)  | 2 (4.88)  | 41 (28.28)         |
| Total <sup>+</sup>                            | 58 (40.00) | 48 (33.10) | 17 (11.72) | 11 (7.59) | 11 (7.59) | 145 (100)          |

Data are expressed as: <sup>♦</sup> – (% in a given group), <sup>+</sup> – n (% of all responses); es – effect size,  
 \* statistical significance; 1 - health is the most important for me, 2 - important,  
 3 - indifferent, 4 - not very important, 5 - completely unimportant

Table S20: The respondents' attitude to their own health in relation to the training frequency

| Training frequency<br>p = 0.611<br>es = 0.08 | 1          | 2          | 3          | 4         | 5         | Total <sup>+</sup> |
|----------------------------------------------|------------|------------|------------|-----------|-----------|--------------------|
| once <sup>♦</sup>                            | 4 (44.44)  | 2 (22.22)  | 2 (22.22)  | 1 (11.11) | ----      | 9 (6.21)           |
| twice <sup>♦</sup>                           | 23 (39.66) | 18 (31.03) | 7 (12.07)  | 6 (10.34) | 4 (6.90)  | 58 (40.00)         |
| three times <sup>♦</sup>                     | 16 (41.03) | 15 (38.46) | 6 (15.38)  | ----      | 2 (5.13)  | 39 (26.90)         |
| four times and more <sup>♦</sup>             | 15 (38.46) | 13 (33.33) | 2 (5.13)   | 4 (10.26) | 5 (12.82) | 39 (26.90)         |
| Total <sup>+</sup>                           | 58 (40.00) | 48 (33.10) | 17 (11.72) | 11 (7.59) | 11 (7.59) | 145 (100)          |

Data are expressed as: <sup>♦</sup> – (% in a given group), <sup>+</sup> – n (% of all responses); es – effect size,  
 \* statistical significance; 1 - health is the most important for me, 2 - important,  
 3 - indifferent, 4 - not very important, 5 - completely unimportant

Table S21: The respondents' attitude to their own health in relation to the place of residence

| Place of residence<br>p = 0.129<br>es = 0.10 | 1          | 2          | 3          | 4         | 5         | Total <sup>+</sup> |
|----------------------------------------------|------------|------------|------------|-----------|-----------|--------------------|
| own flat/ house <sup>♦</sup>                 | 28 (45.90) | 19 (31.15) | 3 (4.92)   | 5 (8.20)  | 6 (9.84)  | 61 (42.07)         |
| with parents <sup>♦</sup>                    | 28 (37.84) | 26 (35.14) | 11 (14.86) | 4 (5.41)  | 5 (6.76)  | 74 (51.03)         |
| dormitory/boarding house <sup>♦</sup>        | 1 (12.50)  | 3 (37.50)  | 3 (37.50)  | 1 (12.50) | ----      | 8 (5.52)           |
| school boarding house <sup>♦</sup>           | 1 (50.00)  | ----       | ----       | 1 (50.00) | ----      | 2 (1.38)           |
| Total <sup>+</sup>                           | 58 (40.00) | 48 (33.10) | 17 (11.72) | 11 (7.59) | 11 (7.59) | 145 (100)          |

Data are expressed as: <sup>♦</sup> – (% in a given group), <sup>+</sup> – n (% of all responses); es – effect size,  
 \* statistical significance; 1 - health is the most important for me, 2 - important,  
 3 - indifferent, 4 - not very important, 5 - completely unimportant



Table S22: Respondents' attitude to nature and ecology, taking into account the training experience

| Training experience              | 1          | 2          | 3          | 4         | 5        | Total <sup>+</sup> |
|----------------------------------|------------|------------|------------|-----------|----------|--------------------|
| p = 0.099                        |            |            |            |           |          |                    |
| es = 0.10                        |            |            |            |           |          |                    |
| less than a year <sup>♦</sup>    | 5 (23.81)  | 10 (47.62) | 2 (9.52)   | 4 (19.05) | ----     | 21 (14.48)         |
| two years <sup>♦</sup>           | 8 (30.77)  | 13 (50.00) | 3 (11.54)  | 1 (3.85)  | 1 (3.85) | 26 (17.93)         |
| three years <sup>♦</sup>         | 3 (20.00)  | 10 (66.67) | 2 (13.33)  | ----      | ----     | 15 (10.34)         |
| four years and more <sup>♦</sup> | 37 (44.58) | 21 (25.30) | 14 (16.87) | 9 (10.84) | 2 (2.41) | 83 (57.24)         |
| Total <sup>+</sup>               | 53 (36.55) | 54 (37.24) | 21 (14.48) | 14 (9.66) | 3 (2.07) | 145 (100)          |

Data are expressed as: <sup>♦</sup> – (% in a given group), <sup>+</sup> – n (% of all responses);  
 es – effect size, \* statistical significance; 1 - very important, 2 - important,  
 3 - indifferent, 4 - not very important, 5 - completely unimportant

Table S23: Respondents' attitude to nature and ecology, taking into account the parents' support in martial arts training

| Support from parents        | 1          | 2          | 3          | 4         | 5        | Total <sup>+</sup> |
|-----------------------------|------------|------------|------------|-----------|----------|--------------------|
| p = 0.904                   |            |            |            |           |          |                    |
| es = 0.06                   |            |            |            |           |          |                    |
| definitely not <sup>♦</sup> | 2 (28.57)  | 3 (42.86)  | 1 (14.29)  | 1 (14.29) | ----     | 7 (4.83)           |
| probably not <sup>♦</sup>   | 3 (18.75)  | 9 (56.25)  | 3 (18.75)  | 1 (6.25)  | ----     | 16 (11.03)         |
| hard to say <sup>♦</sup>    | 7 (38.89)  | 9 (50.00)  | 1 (5.56)   | 1 (5.56)  | ----     | 18 (12.41)         |
| rather yes <sup>♦</sup>     | 11 (35.48) | 9 (29.03)  | 6 (19.35)  | 4 (12.90) | 1 (3.23) | 31 (21.38)         |
| definitely yes <sup>♦</sup> | 30 (41.10) | 24 (32.88) | 10 (13.70) | 7 (9.59)  | 2 (2.74) | 73 (50.34)         |
| Total <sup>+</sup>          | 53 (36.55) | 54 (37.24) | 21 (14.48) | 14 (9.66) | 3 (2.07) | 145 (100)          |

Data are expressed as: <sup>♦</sup> – (% in a given group), <sup>+</sup> – n (% of all responses);  
 es – effect size, \* statistical significance; 1 - very important, 2 - important,  
 3 - indifferent, 4 - not very important, 5 - completely unimportant

Table S24: Respondents' attitude to nature and ecology, taking into account the type of martial art

| Type of martial art     | 1          | 2          | 3          | 4         | 5        | Total <sup>+</sup> |
|-------------------------|------------|------------|------------|-----------|----------|--------------------|
| p = 0.199               |            |            |            |           |          |                    |
| es = 0.09               |            |            |            |           |          |                    |
| karate <sup>♦</sup>     | 4 (22.22)  | 8 (44.44)  | 5 (27.78)  | 1 (5.56)  | ----     | 18 (12.41)         |
| kung-fu <sup>♦</sup>    | 5 (21.74)  | 10 (43.48) | 2 (8.70)   | 5 (21.74) | 1 (4.35) | 23 (15.86)         |
| kickboxing <sup>♦</sup> | 4 (33.33)  | 5 (41.67)  | 2 (16.67)  | ----      | 1 (8.33) | 12 (8.28)          |
| MMA <sup>♦</sup>        | 6 (66.67)  | ----       | 2 (22.22)  | 1 (11.11) | ----     | 9 (6.21)           |
| Idokan <sup>♦</sup>     | 8 (66.67)  | 4 (33.33)  | ----       | ----      | ----     | 12 (8.28)          |
| taekwondo <sup>♦</sup>  | 5 (33.33)  | 4 (26.67)  | 5 (33.33)  | 1 (6.67)  | ----     | 15 (10.34)         |
| judo <sup>♦</sup>       | 5 (33.33)  | 8 (53.33)  | 1 (6.67)   | 1 (6.67)  | ----     | 15 (10.34)         |
| jiu-jitsu <sup>♦</sup>  | 16 (39.02) | 15 (36.59) | 4 (9.76)   | 5 (12.20) | 1 (2.44) | 41 (28.28)         |
| Total <sup>+</sup>      | 53 (36.55) | 54 (37.24) | 21 (14.48) | 14 (9.66) | 3 (2.07) | 145 (100)          |

Data are expressed as: <sup>♦</sup> – (% in a given group), <sup>+</sup> – n (% of all responses);  
 es – effect size, \* statistical significance; 1 - very important, 2 - important,  
 3 - indifferent, 4 - not very important, 5 - completely unimportant

Table S25: Respondents' attitude to nature and ecology, taking into account the training frequency

| Training frequency               | 1          | 2          | 3          | 4         | 5        | Total <sup>+</sup> |
|----------------------------------|------------|------------|------------|-----------|----------|--------------------|
| p = 0.198                        |            |            |            |           |          |                    |
| es = 0.10                        |            |            |            |           |          |                    |
| once <sup>♦</sup>                | 4 (44.44)  | 3 (33.33)  | 1 (11.11)  | 1 (11.11) | ----     | 9 (6.21)           |
| twice <sup>♦</sup>               | 21 (36.21) | 24 (41.38) | 6 (10.34)  | 5 (8.62)  | 2 (3.45) | 58 (40.00)         |
| three times <sup>♦</sup>         | 12 (30.77) | 17 (43.59) | 9 (23.08)  | ----      | 1 (2.56) | 39 (26.90)         |
| four times and more <sup>♦</sup> | 16 (41.03) | 10 (25.64) | 5 (12.82)  | 8 (20.51) | ----     | 39 (26.90)         |
| Total <sup>+</sup>               | 53 (36.55) | 54 (37.24) | 21 (14.48) | 14 (9.66) | 3 (2.07) | 145 (100)          |

Data are expressed as: <sup>♦</sup> – (% in a given group), <sup>+</sup> – n (% of all responses);  
 es – effect size, \* statistical significance; 1 - very important, 2 - important,  
 3 - indifferent, 4 - not very important, 5 - completely unimportant

Table S26: Respondents' attitude to nature and ecology, taking into account the place of residence

| Place of residence                    | 1          | 2          | 3          | 4         | 5        | Total <sup>+</sup> |
|---------------------------------------|------------|------------|------------|-----------|----------|--------------------|
| p = 0.237                             |            |            |            |           |          |                    |
| es = 0.09                             |            |            |            |           |          |                    |
| own flat/ house <sup>♦</sup>          | 27 (44.26) | 20 (32.79) | 7 (11.48)  | 7 (11.48) | ----     | 61 (42.07)         |
| with parents <sup>♦</sup>             | 24 (32.43) | 30 (40.54) | 10 (13.51) | 7 (9.46)  | 3 (4.05) | 74 (51.03)         |
| dormitory/boarding house <sup>♦</sup> | 1 (12.50)  | 3 (37.50)  | 4 (50.00)  | ----      | ----     | 8 (5.52)           |
| school boarding house                 | 1 (50.00)  | 1 (50.00)  | ----       | ----      | ----     | 2 (1.38)           |
| Total <sup>+</sup>                    | 53 (36.55) | 54 (37.24) | 21 (14.48) | 14 (9.66) | 3 (2.07) | 145 (100)          |

Data are expressed as: <sup>♦</sup> – (% in a given group), <sup>+</sup> – n (% of all responses);  
 es – effect size, \* statistical significance; 1 - very important, 2 - important,  
 3 - indifferent, 4 - not very important, 5 - completely unimportant
